# Supplementary material for: Temperate UV-Accelerated Weathering Cycle Combined with HT-GPC Analysis and Drop Point Testing for Determining the Environmental Instability of Polyethylene Films
Source: MDPI journal article supplement (doi:10.3390/polym13142373), 2021-07-20
Supplement: s1 [file s1]

Supplementary Materials

# Temperate UV-Accelerated Weathering Cycle Combined with HT-GPC Analysis and Drop Point Testing for Determining the Environmental Instability of Polyethylene Films

Celine Moreira, Richard Lloyd, Gavin Hill, Florence Huynh, Ana Trufasila, Faith Ly, Hasan Sawal and Christopher Wallis \*

Polymateria Limited, i-Hub, Imperial College White City Campus, 84 Wood Lane, London, W12 0BZ, UK; cm@polymateria.com (C.M.); rl@polymateria.com (R.L.); gh@polymateria.com (G.H.); fh@polymateria.com (F.H.); at@polymateria.com (A.T.); fl@polymateria.com (F.L.); hs@polymateria.com (H.S.)  
\* Correspondence: cw@polymateria.com

## S1. Weathering Data

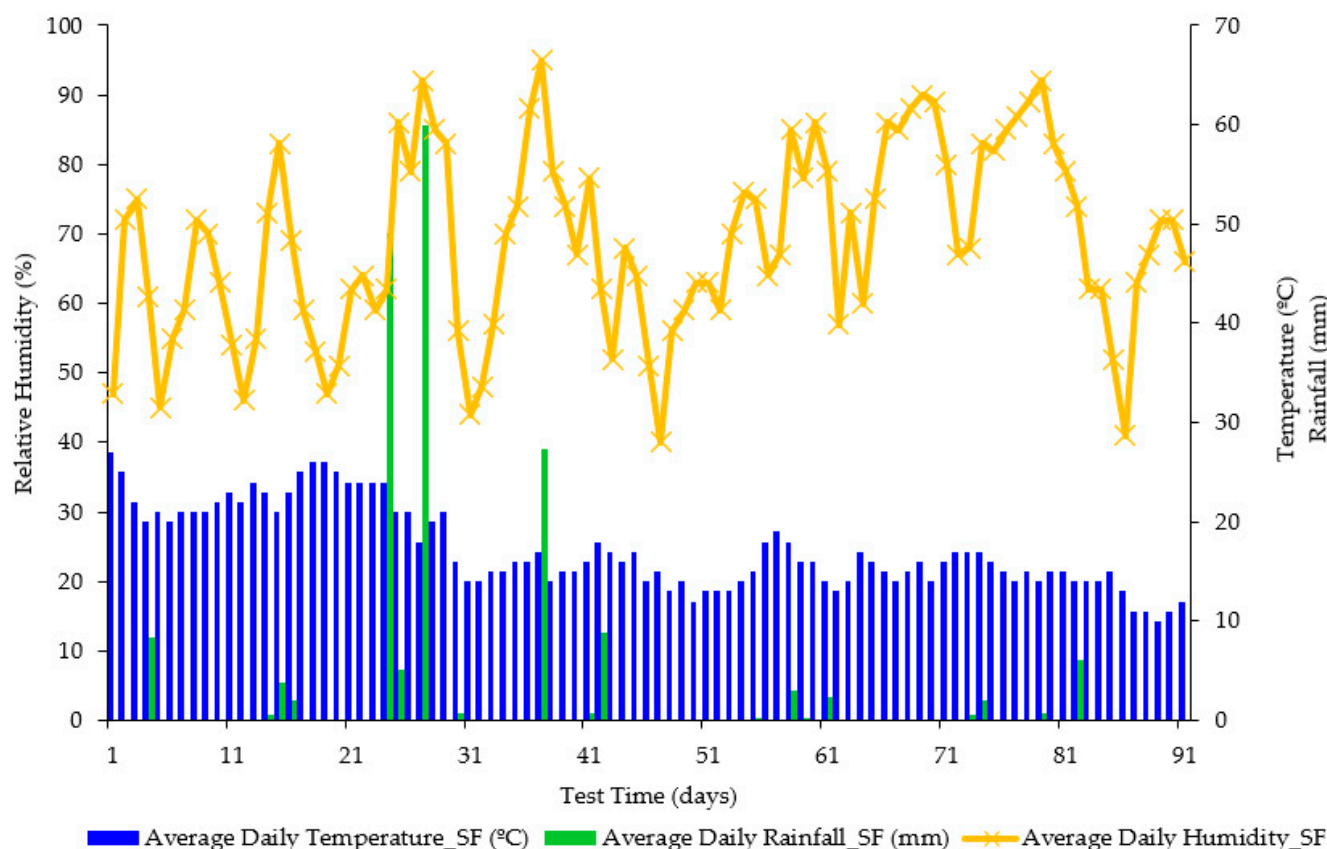

**Figure S1.** Data showing temperature, levels of precipitation and relative humidity for South of France up to 91 days.

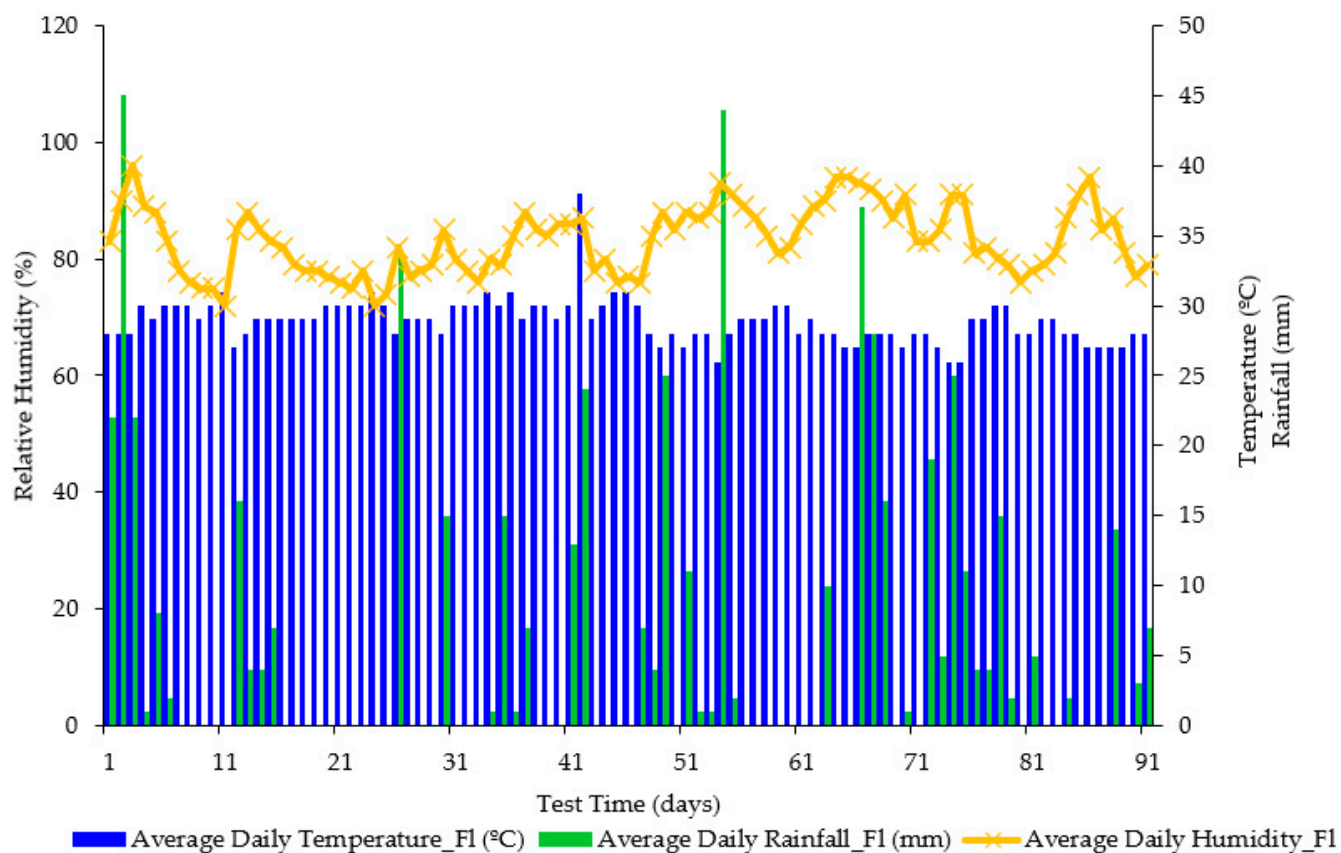

**Figure S2.** Data showing temperature, levels of precipitation and relative humidity for Florida (Summer) up to 91 days.

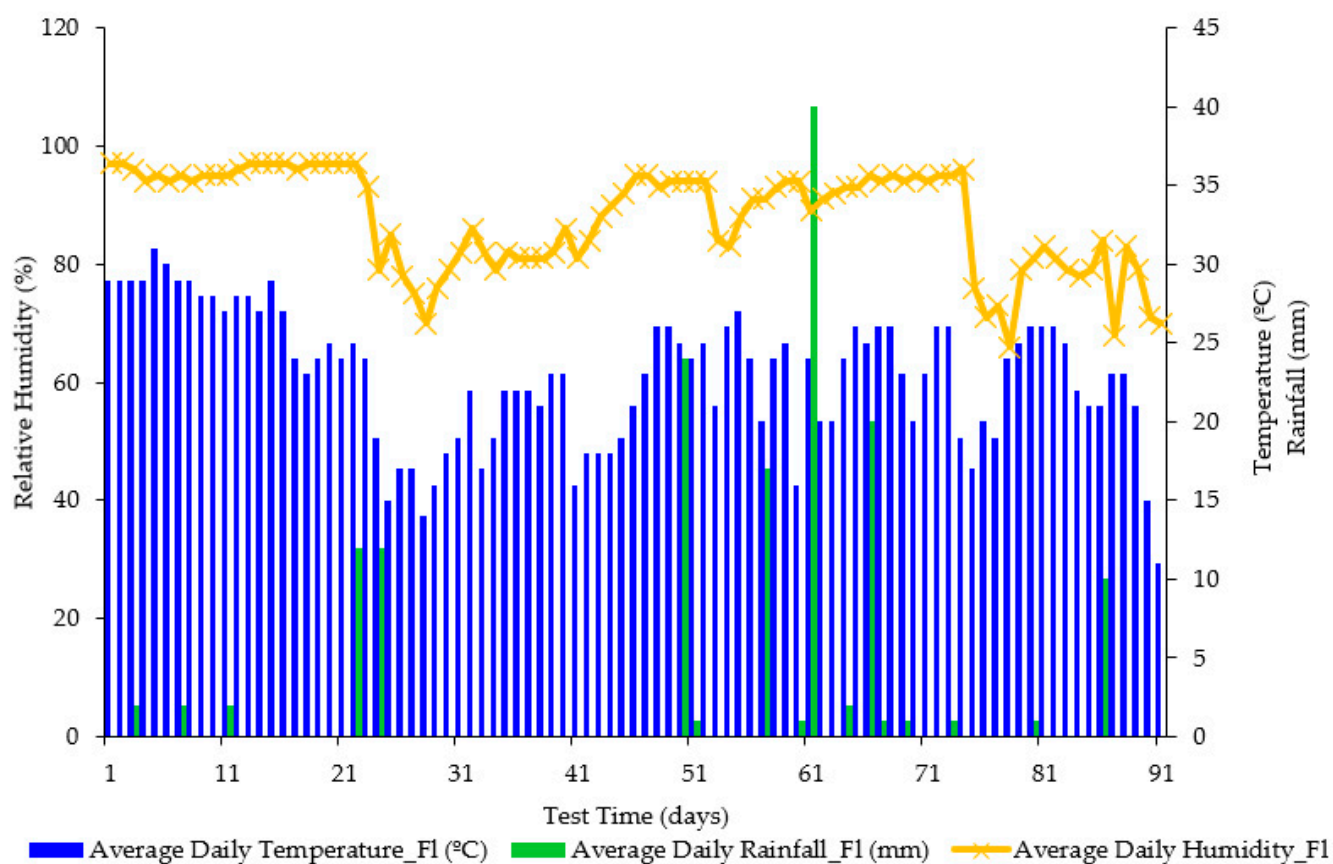

**Figure S3.** Data showing temperature, levels of precipitation and relative humidity for Florida (Winter) up to 91 days.

**Table S1.** Average weather conditions over the exposure period.

| Expsoure Site                         | Calendar period of tempore during expsoure of sample          | Average daily temperature during testing exposure period | Average daily humidity during testing exposure period | Total rainfall during testing exposure period |
|---------------------------------------|---------------------------------------------------------------|----------------------------------------------------------|-------------------------------------------------------|-----------------------------------------------|
| Sanary Sur Mer, France <sup>[b]</sup> | 27 <sup>th</sup> August – 25 <sup>th</sup> Decemeber 2020     | 15.5°C                                                   | 70.5%                                                 | 217 mm                                        |
| Homestead, Florida <sup>[a]</sup>     | 21 <sup>st</sup> July – 19 <sup>th</sup> October 2020         | 28.8°C                                                   | 83.2%                                                 | 498 mm                                        |
| Homestead, Florida <sup>[a]</sup>     | 24 <sup>th</sup> October 2019 – 22 <sup>nd</sup> January 2020 | 22.9°C                                                   | 87.8%                                                 | 149 mm                                        |

## S2. Molecular Weight Analysis

**Table S2.** Table showing the results of the PE films during the temeptrate UV-accelerated laboratory weathering.

|      | Runtime Fraction | PE-01 |        |         |             |         | PE-02 |        |         |             |         |
|------|------------------|-------|--------|---------|-------------|---------|-------|--------|---------|-------------|---------|
|      |                  | CI    | Mn     | Mw      | Mw Loss (%) | Mz      | CI    | Mn     | Mw      | Mw Loss (%) | Mz      |
| 0    | 0                | 0.12  | 37,616 | 110,018 | 0           | 251,393 | 0.09  | 21,554 | 151,588 | 0           | 459,400 |
| 0.92 | 0.067            | 0.06  | 31,011 | 109,470 | 28%         | 281,419 | 0.15  | 8,571  | 24,746  | 78%         | 47,063  |
| 3    | 0.21             | 0.07  | 33,679 | 105,799 | 30%         | 241,274 | 0.75  | 3,266  | 9,815   | 91%         | 19,873  |
| 6    | 0.43             | 0.07  | 32,869 | 114,936 | 24%         | 311,659 | 0.91  | 3,107  | 8,099   | 93%         | 16,581  |
| 7    | 0.5              | 0.11  | 34,453 | 107,947 | 29%         | 254,525 | 0.69  | 2,936  | 7,301   | 93%         | 14,260  |
| 10   | 0.71             | 0.03  | 34,616 | 103,704 | 32%         | 230,252 | 1.39  | 1,979  | 5,397   | 95%         | 11,052  |
| 12   | 0.86             | 0.14  | 31,349 | 105,529 | 30%         | 246,260 | 1.19  | 2,062  | 5,663   | 95%         | 12,884  |
| 14   | 1                | 0.22  | 32,366 | 110,671 | 27%         | 279,801 | 1.60  | 1,956  | 5,397   | 95%         | 11,929  |

**Table S3.** Table showing the results of the PE films samples from Outdoor Weathering in France.

| Time | Runtime Fraction | PE-03 |        |         |             |         | PE-04 |        |         |             |         |
|------|------------------|-------|--------|---------|-------------|---------|-------|--------|---------|-------------|---------|
|      |                  | CI    | Mn     | Mw      | Mw Loss (%) | Mz      | CI    | Mn     | Mw      | Mw Loss (%) | Mz      |
| 0    | 0                | 0.12  | 37,616 | 110,018 | 0%          | 251,393 | 0.09  | 21,554 | 151,588 | 0%          | 459,400 |
| 30   | 0.25             | 0.10  | 26,871 | 85,523  | 22%         | 193,906 | 0.32  | 5,175  | 19,494  | 87%         | 44,833  |
| 60   | 0.5              | 0.21  | 21,156 | 100,249 | 9%          | 262,538 | 0.44  | 3,451  | 16,779  | 89%         | 38,360  |
| 90   | 0.75             | 0.49  | 11,172 | 37,029  | 66%         | 87,500  | 0.52  | 3,319  | 11,566  | 92%         | 26,857  |
| 120  | 1                | 0.26  | 8,479  | 36,198  | 67%         | 104,311 | 0.62  | 2,119  | 9,532   | 93%         | 25,834  |

**Table S4.** Table showing the results of the PE films samples from Outdoor Weathering in Florida Summer and Winter.

| Time | Runtime Fraction | PE-05 |        |         |             |         | Time | Runtime Fraction | PE-06 |         |        |             |         |
|------|------------------|-------|--------|---------|-------------|---------|------|------------------|-------|---------|--------|-------------|---------|
|      |                  | CI    | Mn     | Mw      | Mw Loss (%) | Mz      |      |                  | CI    | Mn      | Mw     | Mw Loss (%) | Mz      |
| 0    | 0                | 0.09  | 21,554 | 151,588 | 0           | 459,400 | 0    | 0                | 0.09  | 151,588 | 21,554 | 0           | 459,400 |
| 6    | 0.078            | 0.09  | 26,454 | 90,062  | 41%         | 232,866 | 12   | 0.13             | 0.47  | 5,342   | 18,611 | 87%         | 43,886  |
| 19   | 0.21             | 0.37  | 4,412  | 17,068  | 89%         | 48,171  | 25   | 0.28             | 0.76  | 3,036   | 19,173 | 87%         | 63,950  |
| 39   | 0.43             | 1.03  | 2,487  | 8,574   | 94%         | 19,450  | 30   | 0.33             | 1.16  | 1,485   | 8,318  | 95%         | 18,668  |
| 45   | 0.50             | 1.07  | 1,676  | 6,241   | 96%         | 13,190  | 42   | 0.47             | 0.73  | 1,083   | 6,907  | 95%         | 16,550  |
| 64   | 0.71             | 1.36  | 1,485  | 5,529   | 97%         | 12,690  | 60   | 0.67             | 0.80  | 1,648   | 7,676  | 95%         | 16,912  |
| 77   | 0.86             | 1.39  | 1,306  | 4,850   | 97%         | 10,955  | 72   | 0.80             | 1.29  | 727     | 4,475  | 97%         | 10,325  |
| 90   | 1                | 1.53  | 1,020  | 4,694   | 97%         | 16,885  | 90   | 1                | 1.45  | 697     | 3,936  | 97%         | 9,179   |

**Table S5.** Table showing the drop point testing results of the PE films samples in triplicate with standard deviation.

| Material      | Time | Runtime Fraction | Dropping Point if below 140°C (°C) | Mean Dropping Point (°C) | Standard Deviation |
|---------------|------|------------------|------------------------------------|--------------------------|--------------------|
| Initial Blank | 0    | 0                | N/A                                | > 140 °C                 | N/A                |
|               |      |                  | N/A                                |                          |                    |
|               |      |                  | N/A                                |                          |                    |
| Initial PLM   | 0    | 0                | N/A                                | > 140 °C                 | N/A                |
|               |      |                  | N/A                                |                          |                    |
|               |      |                  | N/A                                |                          |                    |
| PE-01         | 14   | 1                | N/A                                | > 140 °C                 | N/A                |
|               |      |                  | N/A                                |                          |                    |
|               |      |                  | N/A                                |                          |                    |
| PE-02         | 14   | 1                | 111                                | 113                      | 1.53               |
|               |      |                  | 113                                |                          |                    |
|               |      |                  | 114                                |                          |                    |
| PE-03         | 60   | 0.5              | N/A                                | > 140 °C                 | N/A                |
|               |      |                  | N/A                                |                          |                    |
|               |      |                  | N/A                                |                          |                    |
| PE-03         | 120  | 1                | N/A                                | > 140 °C                 | N/A                |
|               |      |                  | N/A                                |                          |                    |
|               |      |                  | N/A                                |                          |                    |
| PE-04         | 60   | 0.5              | 116                                | 114                      | 1.53               |
|               |      |                  | 114                                |                          |                    |
|               |      |                  | 113                                |                          |                    |
| PE-04         | 120  | 1                | 114                                | 114                      | 0.58               |
|               |      |                  | 115                                |                          |                    |
|               |      |                  | 114                                |                          |                    |
| PE-05         | 45   | 0.5              | 113                                | 112                      | 1.53               |
|               |      |                  | 112                                |                          |                    |
|               |      |                  | 110                                |                          |                    |
| PE-05         | 90   | 1                | 118                                | 113                      | 4.73               |
|               |      |                  | 111                                |                          |                    |
|               |      |                  | 109                                |                          |                    |
| PE-06         | 45   | 0.5              | 115                                | 113                      | 1.53               |
|               |      |                  | 113                                |                          |                    |
|               |      |                  | 112                                |                          |                    |
| PE-06         | 90   | 1                | 116                                | 112                      | 3.79               |
|               |      |                  | 110                                |                          |                    |
|               |      |                  | 109                                |                          |                    |

## S3. Outdoor exposure Testing Certificates

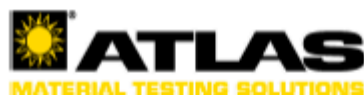

Atlas Material Testing Technology B.V.  
890 Chemin les Hautes du Lancon  
83110 Sanary sur Mer  
France  
rachida.hajaji@ametec.com  
Phone: +33 130 68 89 08  
Fax: +33 1 30 68 89 99  
R.C. Meaux B 329 572 903

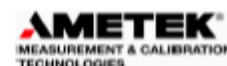

**Confidential**

POLYMATERIA LIMITED  
Mrs Celine Moreira  
80 Wood Lane  
W120BZ London  
UK

## TEST REPORT

### INSPECTION DATA AT 120 Days

Sanary, January 04, 2021

Purchase Order Number: N/A; Release Number: N/A  
Client Code: UKPOLCM

**Test Number:** SS10897

**Report Number:** 4  
**Test Type:** INLAND WEATHERING  
**Test Location:** Sanary, France  
**Specimens Inspected:** 32  
**Description:** 104 samples received ok

**Exposure Type:** Exposure testing is performed in Sanary, France in accordance with ISO877-1 "Plastics - Method of exposure to solar radiation - General Guidance" at a tilt angle(s) of 45° from the horizontal facing south. The specimens are mounted backed on 3mm exterior grade plywood on a 1643 x 3586 mm aluminum exposure rack, with grass groundcover, and the coded side facing the sun.

#### Observations, Deviations and Waivers

Notes contained in relevant documents are an integral part of a test, and shall be included by the client in discussions, correspondence, and presentation of test results to a third party. This Test Report represents only one part of the test documentation. Interim reports and other test documentation may have been submitted prior to this date. Test results reported are pertinent only to the items tested and are not relevant to other specimens of the same type, or in the same lot, which are not being tested. Test Reports, and/or other pertinent test documentation, shall not be reproduced, except in full, without the written approval of Atlas Weathering Services Group and so certified by the client.

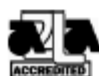

ISO/IEC 17025  
717.07

**Figure S4.** Atlas certificate for the 120-day outdoor exposure of PE-03 and PE-04 in France.

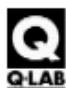

Q-Lab Weathering Research Service  
1005 S.W. 18 Avenue  
P. O. Box 349490  
Homestead, FL 33034

**TEST CERTIFICATE**  
**Natural Weathering**

Test Program Number: *PLL-4-TP-1*  
Company: *Polymateria Limited*  
Address: *Imperial College London I-HUB White City Campus 80 Wood Lane  
London W12 0BZ,  
UNITED KINGDOM*  
Attention: *Ms. Celine Moreira*  
Your Reference: *Project Plan 2*  
No. Of Specimens: *68*  
Specimen Identification: *See following page.*  
Test Method: *ASTM G7 2013*  
Deviations: *None*  
Exposure Date: *July 21, 2020*  
Completion Date: *October 19, 2020*  
Exposure Duration: *2 Months 28 Days*  
Exposure Type: *Direct Weathering- Florida  
45° South  
Backed*  
Radiation Exposure: *Total = 1,449.89 MJ/m2 TUVB = 81.53 MJ/m2*  
  
By:   
Rosie Rosario  
Test Set Up Supervisor  
  
Approved By:   
Michael Crewdson  
General Manager

Figure S5. Q-Lab certificate for the 90-day outdoor exposure of PE-05 in Florida.

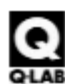

**Q-Lab Weathering Research Service**  
1005 S.W. 18 Avenue  
P. O. Box 349490  
Homestead, FL 33034

**TEST CERTIFICATE**  
**Natural Weathering**

**Test Program Number:** PLL-1-TP-1  
**Company:** Polymateria Limited  
**Address:** Imperial College London I-HUB White City Campus 80 Wood Lane  
London W12 0BZ  
UNITED KINGDOM  
**Attention:** Ms. Celine Moreira  
**Your Reference:**  
**No. Of Specimens:** 10  
**Specimen Identification:** See following page.  
**Test Method:** ASTM G7 2013  
**Deviations:** None  
**Exposure Date:** October 24, 2019  
**Completion Date:** January 22, 2020  
**Exposure Duration:** 2 Months 29 Days  
**Exposure Type:** Direct Weathering- Florida  
45° South  
Backed  
**Radiation Exposure:** Total = 1,632.64 MJ/m<sup>2</sup> TUV<sub>R</sub> = 69.52 MJ/m<sup>2</sup>  
**By:**   
Rosie Rosario  
Test Set Up Supervisor  
**Approved By:**   
Michael Crewdson  
General Manager

**Figure S6.** Q-Lab certificate for the 90-day outdoor exposure of PE-06 in Florida.
